# Supplementary material for: Normative data for the self-reported and parent-reported Strengths and Difficulties Questionnaire (SDQ) for ages 12–17
Source: Springer Nature journal article supplement (doi:10.1186/s13034-021-00437-8), 2022-01-18
Supplement: MOESM2 [file 20045088]

This file is supplemental to manuscript:

Normative data for the self-reported and parent-reported Strengths and Difficulties Questionnaire (SDQ) for ages 12-17

### **Contents**

This file contains the complete norms for both SDQ versions.

Table S1 Norms (percentiles) for the self-reported SDQ version for female adolescents aged 12 to 17

| SDQ Scale     | Age | Scale score |      |      |      |      |      |      |      |      |      |     |
|---------------|-----|-------------|------|------|------|------|------|------|------|------|------|-----|
|               |     | 0           | 1    | 2    | 3    | 4    | 5    | 6    | 7    | 8    | 9    | 10  |
| Emotional     | 12  | 25.2        | 44.5 | 59.7 | 71.7 | 81.0 | 88.0 | 93.0 | 96.4 | 98.5 | 99.6 | 100 |
|               | 13  | 21.6        | 40.6 | 56.6 | 69.5 | 79.7 | 87.3 | 92.8 | 96.4 | 98.6 | 99.7 | 100 |
|               | 14  | 18.2        | 36.7 | 53.3 | 67.2 | 78.2 | 86.6 | 92.5 | 96.4 | 98.6 | 99.7 | 100 |
|               | 15  | 15.1        | 32.8 | 49.8 | 64.5 | 76.5 | 85.7 | 92.1 | 96.3 | 98.6 | 99.7 | 100 |
|               | 16  | 12.4        | 29.0 | 46.1 | 61.7 | 74.6 | 84.6 | 91.7 | 96.2 | 98.6 | 99.7 | 100 |
|               | 17  | 10.0        | 25.3 | 42.3 | 58.6 | 72.5 | 83.4 | 91.1 | 96.0 | 98.6 | 99.7 | 100 |
| Conduct       | 12  | 30.4        | 63.0 | 84.0 | 94.3 | 98.3 | 99.6 | 99.9 | 100  | 100  | 100  | 100 |
|               | 13  | 31.3        | 64.4 | 85.1 | 94.9 | 98.5 | 99.7 | 99.9 | 100  | 100  | 100  | 100 |
|               | 14  | 32.3        | 65.8 | 86.2 | 95.4 | 98.7 | 99.7 | 99.9 | 100  | 100  | 100  | 100 |
|               | 15  | 33.4        | 67.1 | 87.1 | 95.9 | 98.9 | 99.8 | 100  | 100  | 100  | 100  | 100 |
|               | 16  | 34.4        | 68.5 | 88.1 | 96.3 | 99.1 | 99.8 | 100  | 100  | 100  | 100  | 100 |
|               | 17  | 35.5        | 69.8 | 89.0 | 96.7 | 99.2 | 99.8 | 100  | 100  | 100  | 100  | 100 |
| Hyperactivity | 12  | 9.5         | 23.7 | 39.4 | 54.8 | 68.5 | 79.8 | 88.3 | 94.2 | 97.8 | 99.5 | 100 |
|               | 13  | 9.9         | 24.1 | 39.6 | 54.7 | 68.2 | 79.4 | 87.9 | 93.9 | 97.6 | 99.4 | 100 |
|               | 14  | 10.3        | 24.5 | 39.8 | 54.7 | 67.9 | 78.9 | 87.5 | 93.6 | 97.4 | 99.3 | 100 |
|               | 15  | 10.7        | 24.9 | 40.1 | 54.6 | 67.6 | 78.5 | 87.0 | 93.2 | 97.2 | 99.3 | 100 |
|               | 16  | 11.1        | 25.4 | 40.3 | 54.6 | 67.3 | 78.1 | 86.6 | 92.8 | 96.9 | 99.2 | 100 |
|               | 17  | 11.5        | 25.8 | 40.6 | 54.5 | 67.1 | 77.7 | 86.1 | 92.5 | 96.7 | 99.1 | 100 |
| Social        | 12  | 44.1        | 67.6 | 81.6 | 90.0 | 94.9 | 97.6 | 99.0 | 99.6 | 99.9 | 100  | 100 |
|               | 13  | 41.9        | 66.5 | 81.4 | 90.2 | 95.2 | 97.8 | 99.1 | 99.7 | 99.9 | 100  | 100 |
|               | 14  | 39.7        | 65.3 | 81.1 | 90.3 | 95.4 | 98.0 | 99.3 | 99.8 | 99.9 | 100  | 100 |
|               | 15  | 37.6        | 64.1 | 80.8 | 90.5 | 95.7 | 98.2 | 99.4 | 99.8 | 100  | 100  | 100 |
|               | 16  | 35.5        | 62.9 | 80.5 | 90.6 | 95.9 | 98.4 | 99.5 | 99.9 | 100  | 100  | 100 |
|               | 17  | 33.6        | 61.7 | 80.1 | 90.7 | 96.1 | 98.5 | 99.5 | 99.9 | 100  | 100  | 100 |
| Prosocial     | 12  | 100         | 100  | 99.9 | 99.7 | 98.9 | 96.4 | 90.1 | 77.0 | 54.3 | 24.4 | 0.0 |
|               | 13  | 100         | 100  | 99.9 | 99.7 | 98.8 | 96.1 | 89.7 | 76.5 | 54.2 | 24.7 | 0.0 |
|               | 14  | 100         | 100  | 99.9 | 99.6 | 98.6 | 95.8 | 89.2 | 76.1 | 54.2 | 25.1 | 0.0 |
|               | 15  | 100         | 100  | 99.9 | 99.6 | 98.4 | 95.5 | 88.7 | 75.7 | 54.1 | 25.4 | 0.0 |
|               | 16  | 100         | 100  | 99.9 | 99.5 | 98.2 | 95.1 | 88.3 | 75.3 | 54.1 | 25.9 | 0.0 |
|               | 17  | 100         | 100  | 99.8 | 99.4 | 98.0 | 94.7 | 87.7 | 74.8 | 54.1 | 26.3 | 0.0 |

SDQ = Strengths and Difficulties Questionnaire.

Cells containing percentiles  $\geq 90$  are shaded dark gray and cells containing percentiles from 80 up to 90 light gray, with the corresponding scale scores classified as falling in the ‘abnormal’ and ‘borderline’ range, respectively. The remaining scale scores are classified as ‘normal’.

Table S1 (continued) Norms (percentiles) for the self-reported SDQ version for female adolescents aged 12 to 17

| SDQ Scale     | Age  | Scale score |           |           |           |           |           |           |           |           |           |           |           |           |           |           |           |           |           |           |           |           |
|---------------|------|-------------|-----------|-----------|-----------|-----------|-----------|-----------|-----------|-----------|-----------|-----------|-----------|-----------|-----------|-----------|-----------|-----------|-----------|-----------|-----------|-----------|
|               |      | 0           | 1         | 2         | 3         | 4         | 5         | 6         | 7         | 8         | 9         | 10        | 11        | 12        | 13        | 14        | 15        | 16        | 17        | 18        | 19        | 20        |
| Externalizing | 12   | 5.4         | 15.0      | 27.1      | 40.0      | 52.5      | 63.8      | 73.4      | 81.2      | 87.2      | 91.7      | 94.8      | 97.0      | 98.3      | 99.1      | 99.6      | 99.8      | 99.9      | 100       | 100       | 100       | 100       |
|               | 13   | 5.6         | 15.5      | 27.7      | 40.6      | 53.1      | 64.2      | 73.7      | 81.4      | 87.3      | 91.7      | 94.8      | 96.9      | 98.3      | 99.1      | 99.6      | 99.8      | 99.9      | 100       | 100       | 100       | 100       |
|               | 14   | 5.9         | 16.0      | 28.3      | 41.2      | 53.6      | 64.6      | 74.0      | 81.5      | 87.4      | 91.7      | 94.8      | 96.9      | 98.3      | 99.1      | 99.6      | 99.8      | 99.9      | 100       | 100       | 100       | 100       |
|               | 15   | 6.1         | 16.5      | 28.9      | 41.8      | 54.1      | 65.0      | 74.2      | 81.7      | 87.5      | 91.8      | 94.8      | 96.9      | 98.3      | 99.1      | 99.6      | 99.8      | 99.9      | 100       | 100       | 100       | 100       |
|               | 16   | 6.4         | 17.0      | 29.5      | 42.4      | 54.6      | 65.4      | 74.5      | 81.9      | 87.6      | 91.8      | 94.8      | 96.9      | 98.3      | 99.1      | 99.6      | 99.8      | 99.9      | 100       | 100       | 100       | 100       |
|               | 17   | 6.7         | 17.5      | 30.1      | 43.0      | 55.1      | 65.8      | 74.8      | 82.0      | 87.6      | 91.8      | 94.8      | 96.9      | 98.2      | 99.1      | 99.5      | 99.8      | 99.9      | 100       | 100       | 100       | 100       |
| Internalizing | 12   | 17.0        | 32.5      | 46.0      | 57.4      | 66.9      | 74.7      | 81.1      | 86.1      | 90.0      | 93.0      | 95.3      | 96.9      | 98.1      | 98.8      | 99.4      | 99.7      | 99.8      | 99.9      | 100       | 100       | 100       |
|               | 13   | 14.0        | 28.7      | 42.4      | 54.4      | 64.7      | 73.2      | 80.1      | 85.6      | 89.8      | 93.0      | 95.4      | 97.1      | 98.2      | 99.0      | 99.4      | 99.7      | 99.9      | 100       | 100       | 100       | 100       |
|               | 14   | 11.3        | 25.0      | 38.7      | 51.3      | 62.3      | 71.5      | 79.0      | 85.0      | 89.6      | 93.0      | 95.5      | 97.2      | 98.3      | 99.1      | 99.5      | 99.8      | 99.9      | 100       | 100       | 100       | 100       |
|               | 15   | 9.0         | 21.5      | 35.0      | 48.0      | 59.7      | 69.6      | 77.8      | 84.3      | 89.2      | 92.9      | 95.5      | 97.3      | 98.4      | 99.2      | 99.6      | 99.8      | 99.9      | 100       | 100       | 100       | 100       |
|               | 16   | 7.0         | 18.2      | 31.3      | 44.5      | 56.8      | 67.5      | 76.4      | 83.5      | 88.8      | 92.8      | 95.5      | 97.4      | 98.5      | 99.2      | 99.6      | 99.8      | 99.9      | 100       | 100       | 100       | 100       |
|               | 17   | 5.4         | 15.2      | 27.6      | 40.9      | 53.7      | 65.2      | 74.8      | 82.5      | 88.3      | 92.5      | 95.5      | 97.4      | 98.6      | 99.3      | 99.7      | 99.9      | 100       | 100       | 100       | 100       | 100       |
| Total         |      | <b>0</b>    | <b>1</b>  | <b>2</b>  | <b>3</b>  | <b>4</b>  | <b>5</b>  | <b>6</b>  | <b>7</b>  | <b>8</b>  | <b>9</b>  | <b>10</b> | <b>11</b> | <b>12</b> | <b>13</b> | <b>14</b> | <b>15</b> | <b>16</b> | <b>17</b> | <b>18</b> | <b>19</b> | <b>20</b> |
|               | 12   | 0.0         | 2.8       | 6.6       | 11.6      | 18.0      | 25.4      | 33.8      | 42.7      | 51.7      | 60.0      | 67.1      | 73.2      | 78.2      | 82.4      | 85.8      | 88.6      | 90.8      | 92.6      | 94.1      | 95.3      | 96.2      |
|               | 13   | 0.0         | 2.8       | 6.5       | 11.5      | 17.8      | 25.1      | 33.4      | 42.2      | 51.2      | 59.5      | 66.7      | 72.8      | 77.8      | 82.0      | 85.5      | 88.3      | 90.6      | 92.4      | 93.9      | 95.1      | 96.1      |
|               | 14   | 0.0         | 2.7       | 6.4       | 11.4      | 17.6      | 24.9      | 33.0      | 41.8      | 50.7      | 59.0      | 66.2      | 72.3      | 77.4      | 81.7      | 85.2      | 88.0      | 90.3      | 92.2      | 93.8      | 95.0      | 96.0      |
|               | 15   | 0.0         | 2.7       | 6.4       | 11.3      | 17.4      | 24.6      | 32.7      | 41.3      | 50.2      | 58.5      | 65.7      | 71.9      | 77.0      | 81.3      | 84.9      | 87.8      | 90.1      | 92.0      | 93.6      | 94.8      | 95.8      |
|               | 16   | 0.0         | 2.7       | 6.3       | 11.2      | 17.2      | 24.3      | 32.3      | 40.9      | 49.7      | 58.0      | 65.2      | 71.4      | 76.6      | 81.0      | 84.5      | 87.5      | 89.9      | 91.8      | 93.4      | 94.7      | 95.7      |
|               | 17   | 0.0         | 2.7       | 6.3       | 11.0      | 17.0      | 24.0      | 32.0      | 40.5      | 49.2      | 57.5      | 64.8      | 71.0      | 76.2      | 80.6      | 84.2      | 87.2      | 89.6      | 91.6      | 93.2      | 94.5      | 95.6      |
|               |      |             | <b>21</b> | <b>22</b> | <b>23</b> | <b>24</b> | <b>25</b> | <b>26</b> | <b>27</b> | <b>28</b> | <b>29</b> | <b>30</b> | <b>31</b> | <b>32</b> | <b>33</b> | <b>34</b> | <b>35</b> | <b>36</b> | <b>37</b> | <b>38</b> | <b>39</b> | <b>40</b> |
|               | 12   | 97.0        | 97.6      | 98.1      | 98.5      | 98.8      | 99.0      | 99.2      | 99.4      | 99.5      | 99.6      | 99.7      | 99.7      | 99.8      | 99.8      | 99.9      | 99.9      | 99.9      | 99.9      | 99.9      | 99.9      | 100       |
|               | 13   | 96.9        | 97.5      | 98.0      | 98.4      | 98.7      | 99.0      | 99.2      | 99.3      | 99.5      | 99.6      | 99.7      | 99.7      | 99.8      | 99.8      | 99.9      | 99.9      | 99.9      | 99.9      | 99.9      | 99.9      | 100       |
|               | 14   | 96.8        | 97.4      | 97.9      | 98.3      | 98.7      | 98.9      | 99.1      | 99.3      | 99.4      | 99.6      | 99.6      | 99.7      | 99.8      | 99.8      | 99.9      | 99.9      | 99.9      | 99.9      | 99.9      | 99.9      | 100       |
|               | 15   | 96.7        | 97.3      | 97.8      | 98.3      | 98.6      | 98.9      | 99.1      | 99.3      | 99.4      | 99.5      | 99.6      | 99.7      | 99.8      | 99.8      | 99.8      | 99.9      | 99.9      | 99.9      | 99.9      | 99.9      | 99.9      |
|               | 16   | 96.5        | 97.2      | 97.8      | 98.2      | 98.6      | 98.8      | 99.1      | 99.2      | 99.4      | 99.5      | 99.6      | 99.7      | 99.7      | 99.8      | 99.8      | 99.9      | 99.9      | 99.9      | 99.9      | 99.9      | 99.9      |
| 17            | 96.4 | 97.1        | 97.7      | 98.1      | 98.5      | 98.8      | 99.0      | 99.2      | 99.4      | 99.5      | 99.6      | 99.7      | 99.7      | 99.8      | 99.8      | 99.9      | 99.9      | 99.9      | 99.9      | 99.9      | 99.9      |           |

SDQ = Strengths and Difficulties Questionnaire.

Cells containing percentiles  $\geq 90$  are shaded dark gray and cells containing percentiles from 80 up to 90 light gray, with the corresponding scale scores classified as falling in the 'abnormal' and 'borderline' range, respectively. The remaining scale scores are classified as 'normal'.

Table S2 Norms (percentiles) for the self-reported SDQ version for male adolescents aged 12 to 17

| SDQ Scale     | Age | Scale score |      |      |      |      |      |      |      |      |      |     |
|---------------|-----|-------------|------|------|------|------|------|------|------|------|------|-----|
|               |     | 0           | 1    | 2    | 3    | 4    | 5    | 6    | 7    | 8    | 9    | 10  |
| Emotional     | 12  | 37.5        | 61.0 | 76.3 | 86.3 | 92.5 | 96.2 | 98.3 | 99.4 | 99.8 | 100  | 100 |
|               | 13  | 33.6        | 57.7 | 74.3 | 85.3 | 92.1 | 96.1 | 98.3 | 99.4 | 99.8 | 100  | 100 |
|               | 14  | 29.8        | 54.3 | 72.1 | 84.1 | 91.6 | 96.0 | 98.3 | 99.4 | 99.8 | 100  | 100 |
|               | 15  | 26.1        | 50.8 | 69.7 | 82.8 | 91.0 | 95.8 | 98.3 | 99.4 | 99.9 | 100  | 100 |
|               | 16  | 22.7        | 47.1 | 67.0 | 81.2 | 90.3 | 95.5 | 98.2 | 99.4 | 99.9 | 100  | 100 |
|               | 17  | 19.5        | 43.3 | 64.1 | 79.5 | 89.5 | 95.2 | 98.1 | 99.4 | 99.9 | 100  | 100 |
| Conduct       | 12  | 24.8        | 53.0 | 74.5 | 87.9 | 95.0 | 98.2 | 99.5 | 99.9 | 100  | 100  | 100 |
|               | 13  | 25.5        | 54.3 | 75.9 | 88.9 | 95.6 | 98.5 | 99.6 | 99.9 | 100  | 100  | 100 |
|               | 14  | 26.3        | 55.7 | 77.2 | 89.9 | 96.1 | 98.7 | 99.7 | 99.9 | 100  | 100  | 100 |
|               | 15  | 27.1        | 57.0 | 78.5 | 90.8 | 96.6 | 98.9 | 99.7 | 99.9 | 100  | 100  | 100 |
|               | 16  | 27.9        | 58.4 | 79.8 | 91.6 | 97.0 | 99.1 | 99.8 | 100  | 100  | 100  | 100 |
|               | 17  | 28.7        | 59.7 | 81.0 | 92.4 | 97.4 | 99.3 | 99.8 | 100  | 100  | 100  | 100 |
| Hyperactivity | 12  | 6.6         | 18.5 | 33.4 | 49.1 | 64.0 | 76.7 | 86.6 | 93.4 | 97.5 | 99.4 | 100 |
|               | 13  | 6.9         | 18.8 | 33.6 | 49.1 | 63.7 | 76.3 | 86.1 | 93.1 | 97.3 | 99.4 | 100 |
|               | 14  | 7.2         | 19.2 | 33.9 | 49.1 | 63.5 | 75.9 | 85.7 | 92.7 | 97.1 | 99.3 | 100 |
|               | 15  | 7.5         | 19.6 | 34.1 | 49.1 | 63.2 | 75.5 | 85.2 | 92.3 | 96.9 | 99.2 | 100 |
|               | 16  | 7.8         | 20.0 | 34.4 | 49.1 | 63.0 | 75.0 | 84.8 | 92.0 | 96.6 | 99.1 | 100 |
|               | 17  | 8.1         | 20.5 | 34.7 | 49.1 | 62.7 | 74.6 | 84.3 | 91.6 | 96.4 | 99.0 | 100 |
| Social        | 12  | 39.8        | 63.1 | 77.9 | 87.3 | 93.1 | 96.6 | 98.5 | 99.4 | 99.8 | 100  | 100 |
|               | 13  | 37.5        | 61.7 | 77.4 | 87.4 | 93.4 | 96.8 | 98.7 | 99.5 | 99.9 | 100  | 100 |
|               | 14  | 35.2        | 60.3 | 77.0 | 87.5 | 93.7 | 97.1 | 98.8 | 99.6 | 99.9 | 100  | 100 |
|               | 15  | 33.1        | 58.9 | 76.5 | 87.5 | 93.9 | 97.3 | 99.0 | 99.7 | 99.9 | 100  | 100 |
|               | 16  | 31.0        | 57.5 | 76.0 | 87.6 | 94.1 | 97.5 | 99.1 | 99.7 | 99.9 | 100  | 100 |
|               | 17  | 29.0        | 56.1 | 75.5 | 87.6 | 94.4 | 97.7 | 99.2 | 99.8 | 100  | 100  | 100 |
| prosocial     | 12  | 100         | 99.9 | 99.6 | 98.4 | 95.4 | 88.9 | 77.2 | 59.2 | 36.2 | 13.7 | 0.0 |
|               | 13  | 100         | 99.9 | 99.5 | 98.2 | 95.0 | 88.4 | 76.6 | 58.9 | 36.4 | 14.1 | 0.0 |
|               | 14  | 100         | 99.9 | 99.4 | 98.0 | 94.6 | 87.8 | 76.1 | 58.6 | 36.6 | 14.5 | 0.0 |
|               | 15  | 100         | 99.8 | 99.3 | 97.7 | 94.1 | 87.2 | 75.5 | 58.4 | 36.9 | 14.9 | 0.0 |
|               | 16  | 100         | 99.8 | 99.2 | 97.4 | 93.7 | 86.6 | 75.0 | 58.2 | 37.2 | 15.4 | 0.0 |
|               | 17  | 100         | 99.7 | 99.0 | 97.1 | 93.1 | 85.9 | 74.4 | 58.0 | 37.5 | 16.0 | 0.0 |

SDQ = Strengths and Difficulties Questionnaire.

Cells containing percentiles  $\geq 90$  are shaded dark gray and cells containing percentiles from 80 up to 90 light gray, with the corresponding scale scores classified as falling in the 'abnormal' and 'borderline' range, respectively. The remaining scale scores are classified as 'normal'.

Table S2 (continued) Norms (percentiles) for the self-reported SDQ version for male adolescents aged 12 to 17

| SDQ Scale     | Age | Scale score |           |           |           |           |           |           |           |           |           |           |           |           |           |           |           |           |           |           |           |           |     |
|---------------|-----|-------------|-----------|-----------|-----------|-----------|-----------|-----------|-----------|-----------|-----------|-----------|-----------|-----------|-----------|-----------|-----------|-----------|-----------|-----------|-----------|-----------|-----|
|               |     | 0           | 1         | 2         | 3         | 4         | 5         | 6         | 7         | 8         | 9         | 10        | 11        | 12        | 13        | 14        | 15        | 16        | 17        | 18        | 19        | 20        |     |
| Externalizing | 12  | 3.1         | 10.0      | 19.8      | 31.5      | 43.7      | 55.6      | 66.3      | 75.5      | 82.9      | 88.6      | 92.7      | 95.6      | 97.5      | 98.7      | 99.4      | 99.7      | 99.9      | 100       | 100       | 100       | 100       |     |
|               | 13  | 3.3         | 10.4      | 20.4      | 32.1      | 44.3      | 56.1      | 66.7      | 75.7      | 83.0      | 88.7      | 92.8      | 95.6      | 97.5      | 98.7      | 99.4      | 99.7      | 99.9      | 100       | 100       | 100       | 100       |     |
|               | 14  | 3.5         | 10.8      | 20.9      | 32.7      | 44.9      | 56.6      | 67.1      | 76.0      | 83.2      | 88.7      | 92.8      | 95.7      | 97.5      | 98.7      | 99.4      | 99.7      | 99.9      | 100       | 100       | 100       | 100       |     |
|               | 15  | 3.7         | 11.2      | 21.5      | 33.3      | 45.5      | 57.1      | 67.4      | 76.2      | 83.3      | 88.8      | 92.8      | 95.7      | 97.5      | 98.7      | 99.4      | 99.7      | 99.9      | 100       | 100       | 100       | 100       |     |
|               | 16  | 3.9         | 11.6      | 22.0      | 33.9      | 46.0      | 57.6      | 67.8      | 76.5      | 83.5      | 88.9      | 92.9      | 95.7      | 97.5      | 98.7      | 99.4      | 99.7      | 99.9      | 100       | 100       | 100       | 100       |     |
|               | 17  | 4.1         | 12.0      | 22.6      | 34.5      | 46.6      | 58.0      | 68.2      | 76.7      | 83.6      | 89.0      | 92.9      | 95.7      | 97.5      | 98.7      | 99.3      | 99.7      | 99.9      | 100       | 100       | 100       | 100       |     |
| Internalizing | 12  | 22.5        | 40.6      | 55.1      | 66.5      | 75.5      | 82.3      | 87.5      | 91.4      | 94.2      | 96.2      | 97.6      | 98.5      | 99.2      | 99.5      | 99.8      | 99.9      | 100       | 100       | 100       | 100       | 100       |     |
|               | 13  | 19.1        | 36.9      | 51.9      | 64.2      | 73.9      | 81.4      | 87.1      | 91.2      | 94.2      | 96.3      | 97.7      | 98.7      | 99.3      | 99.6      | 99.8      | 99.9      | 100       | 100       | 100       | 100       | 100       |     |
|               | 14  | 16.0        | 33.1      | 48.6      | 61.7      | 72.2      | 80.4      | 86.5      | 91.0      | 94.2      | 96.4      | 97.9      | 98.8      | 99.3      | 99.7      | 99.8      | 99.9      | 100       | 100       | 100       | 100       | 100       |     |
|               | 15  | 13.2        | 29.4      | 45.2      | 59.0      | 70.3      | 79.2      | 85.9      | 90.8      | 94.2      | 96.5      | 98.0      | 98.9      | 99.4      | 99.7      | 99.9      | 100       | 100       | 100       | 100       | 100       | 100       | 100 |
|               | 16  | 10.7        | 25.8      | 41.6      | 56.0      | 68.2      | 77.8      | 85.1      | 90.4      | 94.1      | 96.5      | 98.0      | 98.9      | 99.5      | 99.8      | 99.9      | 100       | 100       | 100       | 100       | 100       | 100       | 100 |
|               | 17  | 8.6         | 22.4      | 38.0      | 52.9      | 65.8      | 76.3      | 84.2      | 90.0      | 93.9      | 96.5      | 98.1      | 99.0      | 99.5      | 99.8      | 99.9      | 100       | 100       | 100       | 100       | 100       | 100       | 100 |
| Total         |     | <b>0</b>    | <b>1</b>  | <b>2</b>  | <b>3</b>  | <b>4</b>  | <b>5</b>  | <b>6</b>  | <b>7</b>  | <b>8</b>  | <b>9</b>  | <b>10</b> | <b>11</b> | <b>12</b> | <b>13</b> | <b>14</b> | <b>15</b> | <b>16</b> | <b>17</b> | <b>18</b> | <b>19</b> | <b>20</b> |     |
|               | 12  | 0.0         | 2.4       | 6.2       | 11.6      | 18.3      | 26.0      | 34.5      | 43.1      | 51.6      | 59.5      | 66.7      | 73.0      | 78.3      | 82.8      | 86.5      | 89.5      | 92.0      | 93.9      | 95.4      | 96.5      | 97.4      |     |
|               | 13  | 0.0         | 2.4       | 6.2       | 11.5      | 18.1      | 25.8      | 34.1      | 42.7      | 51.1      | 59.1      | 66.2      | 72.5      | 77.9      | 82.4      | 86.2      | 89.3      | 91.7      | 93.7      | 95.2      | 96.4      | 97.3      |     |
|               | 14  | 0.0         | 2.4       | 6.1       | 11.3      | 17.9      | 25.5      | 33.7      | 42.2      | 50.7      | 58.6      | 65.7      | 72.1      | 77.5      | 82.1      | 85.9      | 89.0      | 91.5      | 93.4      | 95.0      | 96.2      | 97.2      |     |
|               | 15  | 0.0         | 2.4       | 6.1       | 11.2      | 17.7      | 25.2      | 33.4      | 41.8      | 50.2      | 58.1      | 65.3      | 71.6      | 77.1      | 81.7      | 85.5      | 88.7      | 91.2      | 93.2      | 94.8      | 96.1      | 97.0      |     |
|               | 16  | 0.0         | 2.4       | 6.0       | 11.1      | 17.5      | 24.9      | 33.0      | 41.4      | 49.7      | 57.6      | 64.8      | 71.1      | 76.6      | 81.3      | 85.2      | 88.4      | 90.9      | 93.0      | 94.6      | 95.9      | 96.9      |     |
|               | 17  | 0.0         | 2.3       | 5.9       | 11.0      | 17.3      | 24.6      | 32.7      | 41.0      | 49.3      | 57.1      | 64.3      | 70.7      | 76.2      | 80.9      | 84.8      | 88.1      | 90.7      | 92.8      | 94.5      | 95.8      | 96.8      |     |
|               |     |             | <b>21</b> | <b>22</b> | <b>23</b> | <b>24</b> | <b>25</b> | <b>26</b> | <b>27</b> | <b>28</b> | <b>29</b> | <b>30</b> | <b>31</b> | <b>32</b> | <b>33</b> | <b>34</b> | <b>35</b> | <b>36</b> | <b>37</b> | <b>38</b> | <b>39</b> | <b>40</b> |     |
|               | 12  |             | 98.1      | 98.6      | 99.0      | 99.2      | 99.4      | 99.6      | 99.7      | 99.8      | 99.9      | 99.9      | 99.9      | 99.9      | 100       | 100       | 100       | 100       | 100       | 100       | 100       | 100       |     |
|               | 13  |             | 98.0      | 98.5      | 98.9      | 99.2      | 99.4      | 99.6      | 99.7      | 99.8      | 99.8      | 99.9      | 99.9      | 99.9      | 100       | 100       | 100       | 100       | 100       | 100       | 100       | 100       |     |
|               | 14  |             | 97.9      | 98.4      | 98.8      | 99.2      | 99.4      | 99.6      | 99.7      | 99.8      | 99.8      | 99.9      | 99.9      | 99.9      | 100       | 100       | 100       | 100       | 100       | 100       | 100       | 100       |     |
|               | 15  |             | 97.8      | 98.4      | 98.8      | 99.1      | 99.3      | 99.5      | 99.7      | 99.8      | 99.8      | 99.9      | 99.9      | 99.9      | 100       | 100       | 100       | 100       | 100       | 100       | 100       | 100       |     |
|               | 16  |             | 97.7      | 98.3      | 98.7      | 99.1      | 99.3      | 99.5      | 99.6      | 99.7      | 99.8      | 99.9      | 99.9      | 99.9      | 100       | 100       | 100       | 100       | 100       | 100       | 100       | 100       |     |
| 17            |     | 97.6        | 98.2      | 98.7      | 99.0      | 99.3      | 99.5      | 99.6      | 99.7      | 99.8      | 99.9      | 99.9      | 99.9      | 99.9      | 100       | 100       | 100       | 100       | 100       | 100       | 100       |           |     |

SDQ = Strengths and Difficulties Questionnaire.

Cells containing percentiles  $\geq 90$  are shaded dark gray and cells containing percentiles from 80 up to 90 light gray, with the corresponding scale scores classified as falling in the 'abnormal' and 'borderline' range, respectively. The remaining scale scores are classified as 'normal'.

Table S3 Norms (percentiles) for the self-reported SDQ version for adolescents aged 12 to 17, without distinguishing between genders

| SDQ Scale     | Age | Scale score |      |      |      |      |      |      |      |      |      |     |
|---------------|-----|-------------|------|------|------|------|------|------|------|------|------|-----|
|               |     | 0           | 1    | 2    | 3    | 4    | 5    | 6    | 7    | 8    | 9    | 10  |
| Emotional     | 12  | 31.3        | 52.9 | 68.6 | 79.8 | 87.7 | 93.0 | 96.4 | 98.4 | 99.4 | 99.9 | 100 |
|               | 13  | 27.7        | 49.3 | 65.7 | 77.8 | 86.4 | 92.3 | 96.1 | 98.3 | 99.4 | 99.9 | 100 |
|               | 14  | 24.3        | 45.5 | 62.5 | 75.6 | 85.0 | 91.5 | 95.7 | 98.1 | 99.4 | 99.9 | 100 |
|               | 15  | 21.0        | 41.6 | 59.2 | 73.1 | 83.4 | 90.6 | 95.2 | 97.9 | 99.3 | 99.9 | 100 |
|               | 16  | 18.0        | 37.7 | 55.7 | 70.3 | 81.5 | 89.5 | 94.6 | 97.7 | 99.2 | 99.8 | 100 |
|               | 17  | 15.2        | 33.9 | 51.9 | 67.3 | 79.4 | 88.2 | 94.0 | 97.4 | 99.1 | 99.8 | 100 |
| Conduct       | 12  | 27.3        | 57.3 | 78.7 | 90.8 | 96.6 | 98.9 | 99.7 | 99.9 | 100  | 100  | 100 |
|               | 13  | 28.3        | 58.9 | 80.1 | 91.8 | 97.1 | 99.1 | 99.8 | 100  | 100  | 100  | 100 |
|               | 14  | 29.3        | 60.4 | 81.5 | 92.6 | 97.5 | 99.3 | 99.8 | 100  | 100  | 100  | 100 |
|               | 15  | 30.4        | 62.0 | 82.8 | 93.4 | 97.8 | 99.4 | 99.9 | 100  | 100  | 100  | 100 |
|               | 16  | 31.5        | 63.5 | 84.0 | 94.1 | 98.2 | 99.5 | 99.9 | 100  | 100  | 100  | 100 |
|               | 17  | 32.6        | 65.1 | 85.2 | 94.7 | 98.4 | 99.6 | 99.9 | 100  | 100  | 100  | 100 |
| Hyperactivity | 12  | 8.0         | 20.9 | 36.2 | 51.7 | 66.0 | 78.0 | 87.2 | 93.7 | 97.6 | 99.4 | 100 |
|               | 13  | 8.3         | 21.4 | 36.5 | 51.8 | 65.8 | 77.7 | 86.9 | 93.4 | 97.4 | 99.4 | 100 |
|               | 14  | 8.7         | 21.8 | 36.8 | 51.9 | 65.7 | 77.4 | 86.5 | 93.1 | 97.2 | 99.3 | 100 |
|               | 15  | 9.0         | 22.3 | 37.2 | 52.0 | 65.5 | 77.0 | 86.2 | 92.8 | 97.0 | 99.2 | 100 |
|               | 16  | 9.4         | 22.8 | 37.5 | 52.1 | 65.4 | 76.7 | 85.8 | 92.5 | 96.8 | 99.2 | 100 |
|               | 17  | 9.8         | 23.2 | 37.8 | 52.1 | 65.2 | 76.4 | 85.4 | 92.1 | 96.6 | 99.1 | 100 |
| Social        | 12  | 41.6        | 65.0 | 79.4 | 88.4 | 93.8 | 97.0 | 98.7 | 99.5 | 99.9 | 100  | 100 |
|               | 13  | 39.5        | 63.8 | 79.2 | 88.6 | 94.2 | 97.3 | 98.9 | 99.6 | 99.9 | 100  | 100 |
|               | 14  | 37.4        | 62.7 | 78.9 | 88.8 | 94.5 | 97.6 | 99.0 | 99.7 | 99.9 | 100  | 100 |
|               | 15  | 35.4        | 61.6 | 78.7 | 89.0 | 94.8 | 97.8 | 99.2 | 99.8 | 99.9 | 100  | 100 |
|               | 16  | 33.5        | 60.5 | 78.4 | 89.2 | 95.1 | 98.0 | 99.3 | 99.8 | 100  | 100  | 100 |
|               | 17  | 31.7        | 59.3 | 78.2 | 89.4 | 95.4 | 98.2 | 99.4 | 99.8 | 100  | 100  | 100 |
| prosocial     | 12  | 100         | 100  | 99.8 | 99.1 | 97.1 | 92.5 | 83.1 | 67.1 | 44.1 | 18.4 | 0.0 |
|               | 13  | 100         | 100  | 99.7 | 99.0 | 96.9 | 92.1 | 82.8 | 67.0 | 44.6 | 19.1 | 0.0 |
|               | 14  | 100         | 99.9 | 99.7 | 98.8 | 96.6 | 91.7 | 82.4 | 67.0 | 45.1 | 19.8 | 0.0 |
|               | 15  | 100         | 99.9 | 99.6 | 98.7 | 96.3 | 91.3 | 82.1 | 67.0 | 45.6 | 20.6 | 0.0 |
|               | 16  | 100         | 99.9 | 99.5 | 98.5 | 96.0 | 90.9 | 81.7 | 67.0 | 46.2 | 21.4 | 0.0 |
|               | 17  | 100         | 99.9 | 99.5 | 98.3 | 95.7 | 90.5 | 81.4 | 67.0 | 46.8 | 22.3 | 0.0 |

SDQ = Strengths and Difficulties Questionnaire.

Cells containing percentiles  $\geq 90$  are shaded dark gray and cells containing percentiles from 80 up to 90 light gray, with the corresponding scale scores classified as falling in the 'abnormal' and 'borderline' range, respectively. The remaining scale scores are classified as 'normal'.

Table S3 (continued) Norms (percentiles) for the self-reported SDQ version for adolescents aged 12 to 17, without distinguishing between genders

| SDQ Scale     | Age | Scale score |           |           |           |           |           |           |           |           |           |           |           |           |           |           |           |           |           |           |           |           |
|---------------|-----|-------------|-----------|-----------|-----------|-----------|-----------|-----------|-----------|-----------|-----------|-----------|-----------|-----------|-----------|-----------|-----------|-----------|-----------|-----------|-----------|-----------|
|               |     | 0           | 1         | 2         | 3         | 4         | 5         | 6         | 7         | 8         | 9         | 10        | 11        | 12        | 13        | 14        | 15        | 16        | 17        | 18        | 19        | 20        |
| Externalizing | 12  | 4.1         | 12.3      | 23.1      | 35.4      | 47.7      | 59.3      | 69.5      | 78.0      | 84.7      | 89.9      | 93.6      | 96.2      | 97.8      | 98.9      | 99.5      | 99.8      | 99.9      | 100       | 100       | 100       | 100       |
|               | 13  | 4.4         | 12.8      | 23.8      | 36.1      | 48.5      | 59.9      | 70.0      | 78.3      | 85.0      | 90.0      | 93.7      | 96.2      | 97.9      | 98.9      | 99.5      | 99.8      | 99.9      | 100       | 100       | 100       | 100       |
|               | 14  | 4.6         | 13.3      | 24.5      | 36.9      | 49.2      | 60.6      | 70.5      | 78.7      | 85.2      | 90.2      | 93.8      | 96.2      | 97.9      | 98.9      | 99.5      | 99.8      | 99.9      | 100       | 100       | 100       | 100       |
|               | 15  | 4.9         | 13.8      | 25.3      | 37.7      | 49.9      | 61.2      | 71.0      | 79.1      | 85.5      | 90.3      | 93.9      | 96.3      | 97.9      | 98.9      | 99.5      | 99.8      | 99.9      | 100       | 100       | 100       | 100       |
|               | 16  | 5.2         | 14.4      | 26.0      | 38.4      | 50.6      | 61.8      | 71.4      | 79.4      | 85.7      | 90.5      | 93.9      | 96.3      | 97.9      | 98.9      | 99.5      | 99.8      | 99.9      | 100       | 100       | 100       | 100       |
|               | 17  | 5.4         | 14.9      | 26.7      | 39.2      | 51.4      | 62.4      | 71.9      | 79.7      | 85.9      | 90.6      | 94.0      | 96.4      | 97.9      | 98.9      | 99.5      | 99.8      | 99.9      | 100       | 100       | 100       | 100       |
| Internalizing | 12  | 19.5        | 36.5      | 50.6      | 62.2      | 71.5      | 78.9      | 84.7      | 89.2      | 92.5      | 94.9      | 96.7      | 97.9      | 98.8      | 99.3      | 99.6      | 99.8      | 99.9      | 100       | 100       | 100       | 100       |
|               | 13  | 16.5        | 32.8      | 47.2      | 59.5      | 69.5      | 77.6      | 83.8      | 88.7      | 92.3      | 94.9      | 96.7      | 98.0      | 98.8      | 99.4      | 99.7      | 99.8      | 99.9      | 100       | 100       | 100       | 100       |
|               | 14  | 13.7        | 29.1      | 43.7      | 56.5      | 67.3      | 76.0      | 82.8      | 88.1      | 92.0      | 94.8      | 96.7      | 98.0      | 98.9      | 99.4      | 99.7      | 99.9      | 99.9      | 100       | 100       | 100       | 100       |
|               | 15  | 11.2        | 25.6      | 40.1      | 53.4      | 64.8      | 74.2      | 81.7      | 87.4      | 91.6      | 94.6      | 96.7      | 98.1      | 98.9      | 99.4      | 99.7      | 99.9      | 100       | 100       | 100       | 100       | 100       |
|               | 16  | 9.0         | 22.1      | 36.4      | 50.0      | 62.1      | 72.3      | 80.4      | 86.6      | 91.2      | 94.4      | 96.6      | 98.1      | 99.0      | 99.5      | 99.8      | 99.9      | 100       | 100       | 100       | 100       | 100       |
|               | 17  | 7.1         | 18.9      | 32.7      | 46.5      | 59.2      | 70.1      | 78.8      | 85.6      | 90.6      | 94.2      | 96.5      | 98.0      | 99.0      | 99.5      | 99.8      | 99.9      | 100       | 100       | 100       | 100       | 100       |
| Total         |     | <b>0</b>    | <b>1</b>  | <b>2</b>  | <b>3</b>  | <b>4</b>  | <b>5</b>  | <b>6</b>  | <b>7</b>  | <b>8</b>  | <b>9</b>  | <b>10</b> | <b>11</b> | <b>12</b> | <b>13</b> | <b>14</b> | <b>15</b> | <b>16</b> | <b>17</b> | <b>18</b> | <b>19</b> | <b>20</b> |
|               | 12  | 0.0         | 2.6       | 6.4       | 11.6      | 18.1      | 25.7      | 34.1      | 43.0      | 51.8      | 60.0      | 67.2      | 73.3      | 78.5      | 82.8      | 86.3      | 89.1      | 91.4      | 93.3      | 94.7      | 95.9      | 96.8      |
|               | 13  | 0.0         | 2.6       | 6.3       | 11.4      | 17.8      | 25.4      | 33.7      | 42.4      | 51.2      | 59.4      | 66.6      | 72.8      | 78.0      | 82.4      | 85.9      | 88.8      | 91.2      | 93.0      | 94.5      | 95.7      | 96.7      |
|               | 14  | 0.0         | 2.6       | 6.3       | 11.3      | 17.6      | 25.0      | 33.3      | 41.9      | 50.6      | 58.8      | 66.0      | 72.3      | 77.5      | 81.9      | 85.5      | 88.5      | 90.9      | 92.8      | 94.3      | 95.6      | 96.5      |
|               | 15  | 0.0         | 2.5       | 6.2       | 11.2      | 17.4      | 24.7      | 32.8      | 41.4      | 50.1      | 58.2      | 65.5      | 71.8      | 77.1      | 81.5      | 85.2      | 88.2      | 90.6      | 92.6      | 94.1      | 95.4      | 96.4      |
|               | 16  | 0.0         | 2.5       | 6.1       | 11.0      | 17.2      | 24.4      | 32.4      | 40.9      | 49.5      | 57.7      | 64.9      | 71.2      | 76.6      | 81.1      | 84.8      | 87.8      | 90.3      | 92.3      | 93.9      | 95.2      | 96.2      |
|               | 17  | 0.0         | 2.5       | 6.0       | 10.9      | 17.0      | 24.1      | 32.0      | 40.4      | 49.0      | 57.1      | 64.4      | 70.7      | 76.1      | 80.6      | 84.4      | 87.5      | 90.0      | 92.1      | 93.7      | 95.0      | 96.1      |
|               |     |             | <b>21</b> | <b>22</b> | <b>23</b> | <b>24</b> | <b>25</b> | <b>26</b> | <b>27</b> | <b>28</b> | <b>29</b> | <b>30</b> | <b>31</b> | <b>32</b> | <b>33</b> | <b>34</b> | <b>35</b> | <b>36</b> | <b>37</b> | <b>38</b> | <b>39</b> | <b>40</b> |
|               | 12  |             | 97.5      | 98.1      | 98.5      | 98.9      | 99.1      | 99.3      | 99.5      | 99.6      | 99.7      | 99.8      | 99.8      | 99.9      | 99.9      | 99.9      | 99.9      | 100       | 100       | 100       | 100       | 100       |
|               | 13  |             | 97.4      | 98.0      | 98.4      | 98.8      | 99.1      | 99.3      | 99.4      | 99.6      | 99.7      | 99.7      | 99.8      | 99.9      | 99.9      | 99.9      | 99.9      | 100       | 100       | 100       | 100       | 100       |
|               | 14  |             | 97.3      | 97.9      | 98.4      | 98.7      | 99.0      | 99.2      | 99.4      | 99.5      | 99.7      | 99.7      | 99.8      | 99.8      | 99.9      | 99.9      | 99.9      | 99.9      | 100       | 100       | 100       | 100       |
|               | 15  |             | 97.2      | 97.8      | 98.3      | 98.7      | 99.0      | 99.2      | 99.4      | 99.5      | 99.6      | 99.7      | 99.8      | 99.8      | 99.9      | 99.9      | 99.9      | 99.9      | 100       | 100       | 100       | 100       |
|               | 16  |             | 97.0      | 97.7      | 98.2      | 98.6      | 98.9      | 99.2      | 99.3      | 99.5      | 99.6      | 99.7      | 99.8      | 99.8      | 99.9      | 99.9      | 99.9      | 99.9      | 100       | 100       | 100       | 100       |
| 17            |     | 96.9        | 97.6      | 98.1      | 98.5      | 98.9      | 99.1      | 99.3      | 99.5      | 99.6      | 99.7      | 99.7      | 99.8      | 99.9      | 99.9      | 99.9      | 99.9      | 99.9      | 100       | 100       | 100       |           |

SDQ = Strengths and Difficulties Questionnaire.

Cells containing percentiles  $\geq 90$  are shaded dark gray and cells containing percentiles from 80 up to 90 light gray, with the corresponding scale scores classified as falling in the 'abnormal' and 'borderline' range, respectively. The remaining scale scores are classified as 'normal'.

Table S4 Norms (percentiles) for the parent-reported SDQ version for female adolescents aged 12 to 17

| SDQ Scale     | Age | Scale score |      |      |      |      |      |      |      |      |      |     |
|---------------|-----|-------------|------|------|------|------|------|------|------|------|------|-----|
|               |     | 0           | 1    | 2    | 3    | 4    | 5    | 6    | 7    | 8    | 9    | 10  |
| Emotional     | 12  | 32.7        | 52.8 | 67.2 | 77.8 | 85.6 | 91.1 | 95.0 | 97.5 | 99.0 | 99.8 | 100 |
|               | 13  | 32.4        | 52.9 | 67.5 | 78.2 | 86.0 | 91.5 | 95.3 | 97.7 | 99.1 | 99.8 | 100 |
|               | 14  | 32.2        | 52.9 | 67.8 | 78.6 | 86.4 | 91.9 | 95.6 | 97.9 | 99.2 | 99.8 | 100 |
|               | 15  | 31.9        | 52.9 | 68.1 | 79.0 | 86.9 | 92.3 | 95.9 | 98.1 | 99.3 | 99.8 | 100 |
|               | 16  | 31.7        | 53.0 | 68.3 | 79.4 | 87.3 | 92.7 | 96.1 | 98.2 | 99.4 | 99.9 | 100 |
|               | 17  | 31.5        | 53.1 | 68.7 | 79.8 | 87.7 | 93.0 | 96.4 | 98.4 | 99.4 | 99.9 | 100 |
| Conduct       | 12  | 45.7        | 74.5 | 89.3 | 95.9 | 98.6 | 99.6 | 99.9 | 100  | 100  | 100  | 100 |
|               | 13  | 47.0        | 75.0 | 89.2 | 95.8 | 98.5 | 99.5 | 99.9 | 100  | 100  | 100  | 100 |
|               | 14  | 48.4        | 75.4 | 89.1 | 95.6 | 98.4 | 99.5 | 99.9 | 100  | 100  | 100  | 100 |
|               | 15  | 49.8        | 75.8 | 89.1 | 95.4 | 98.2 | 99.4 | 99.8 | 100  | 100  | 100  | 100 |
|               | 16  | 51.2        | 76.3 | 89.0 | 95.2 | 98.1 | 99.3 | 99.8 | 99.9 | 100  | 100  | 100 |
|               | 17  | 52.6        | 76.7 | 88.9 | 95.0 | 97.9 | 99.2 | 99.7 | 99.9 | 100  | 100  | 100 |
| Hyperactivity | 12  | 29.8        | 47.6 | 60.8 | 71.2 | 79.4 | 85.9 | 91.0 | 94.8 | 97.5 | 99.2 | 100 |
|               | 13  | 30.4        | 49.1 | 62.8 | 73.4 | 81.6 | 87.9 | 92.6 | 96.0 | 98.2 | 99.5 | 100 |
|               | 14  | 31.1        | 50.6 | 64.9 | 75.7 | 83.8 | 89.8 | 94.1 | 96.9 | 98.7 | 99.7 | 100 |
|               | 15  | 31.8        | 52.3 | 67.1 | 77.9 | 85.8 | 91.5 | 95.3 | 97.7 | 99.1 | 99.8 | 100 |
|               | 16  | 32.7        | 54.1 | 69.3 | 80.1 | 87.8 | 93.0 | 96.3 | 98.3 | 99.4 | 99.9 | 100 |
|               | 17  | 33.7        | 55.9 | 71.5 | 82.3 | 89.6 | 94.3 | 97.2 | 98.8 | 99.6 | 99.9 | 100 |
| Social        | 12  | 48.2        | 68.2 | 80.1 | 87.7 | 92.7 | 95.9 | 97.9 | 99.1 | 99.7 | 99.9 | 100 |
|               | 13  | 46.5        | 67.2 | 79.7 | 87.7 | 92.8 | 96.1 | 98.1 | 99.2 | 99.7 | 99.9 | 100 |
|               | 14  | 44.8        | 66.2 | 79.3 | 87.6 | 93.0 | 96.2 | 98.2 | 99.2 | 99.8 | 100  | 100 |
|               | 15  | 43.1        | 65.2 | 78.9 | 87.6 | 93.1 | 96.4 | 98.3 | 99.3 | 99.8 | 100  | 100 |
|               | 16  | 41.4        | 64.2 | 78.5 | 87.6 | 93.2 | 96.5 | 98.4 | 99.4 | 99.8 | 100  | 100 |
|               | 17  | 39.8        | 63.2 | 78.1 | 87.5 | 93.3 | 96.7 | 98.5 | 99.5 | 99.8 | 100  | 100 |
| prosocial     | 12  | 100         | 99.6 | 98.9 | 97.5 | 95.1 | 91.4 | 85.7 | 77.1 | 64.2 | 43.6 | 0.0 |
|               | 13  | 100         | 99.7 | 99.0 | 97.7 | 95.3 | 91.4 | 85.3 | 76.1 | 62.1 | 40.5 | 0.0 |
|               | 14  | 100         | 99.7 | 99.1 | 97.8 | 95.4 | 91.4 | 84.9 | 74.9 | 60.0 | 37.4 | 0.0 |
|               | 15  | 100         | 99.8 | 99.2 | 98.0 | 95.6 | 91.4 | 84.5 | 73.8 | 57.8 | 34.4 | 0.0 |
|               | 16  | 100         | 99.8 | 99.3 | 98.1 | 95.7 | 91.3 | 84.0 | 72.5 | 55.5 | 31.5 | 0.0 |
|               | 17  | 100         | 99.8 | 99.4 | 98.2 | 95.8 | 91.2 | 83.4 | 71.1 | 53.1 | 28.7 | 0.0 |

SDQ = Strengths and Difficulties Questionnaire.

Cells containing percentiles  $\geq 90$  are shaded dark gray and cells containing percentiles from 80 up to 90 light gray, with the corresponding scale scores classified as falling in the 'abnormal' and 'borderline' range, respectively. The remaining scale scores are classified as 'normal'.



Table S4 (continued) Norms (percentiles) for the parent-reported SDQ version for female adolescents aged 12 to 17

| SDQ Scale     | Age | Scale score |           |           |           |           |           |           |           |           |           |           |           |           |           |           |           |           |           |           |           |           |     |
|---------------|-----|-------------|-----------|-----------|-----------|-----------|-----------|-----------|-----------|-----------|-----------|-----------|-----------|-----------|-----------|-----------|-----------|-----------|-----------|-----------|-----------|-----------|-----|
|               |     | 0           | 1         | 2         | 3         | 4         | 5         | 6         | 7         | 8         | 9         | 10        | 11        | 12        | 13        | 14        | 15        | 16        | 17        | 18        | 19        | 20        |     |
| Externalizing | 12  | 20.2        | 36.6      | 50.0      | 61.1      | 70.1      | 77.3      | 83.1      | 87.6      | 91.1      | 93.8      | 95.8      | 97.3      | 98.3      | 99.0      | 99.4      | 99.7      | 99.9      | 99.9      | 100       | 100       | 100       |     |
|               | 13  | 21.1        | 38.1      | 51.9      | 63.0      | 71.9      | 79.0      | 84.6      | 88.9      | 92.2      | 94.6      | 96.4      | 97.7      | 98.6      | 99.2      | 99.6      | 99.8      | 99.9      | 100       | 100       | 100       | 100       |     |
|               | 14  | 22.1        | 39.7      | 53.7      | 64.9      | 73.7      | 80.6      | 86.0      | 90.1      | 93.1      | 95.4      | 97.0      | 98.1      | 98.9      | 99.3      | 99.7      | 99.8      | 99.9      | 100       | 100       | 100       | 100       |     |
|               | 15  | 23.2        | 41.3      | 55.5      | 66.7      | 75.5      | 82.2      | 87.3      | 91.2      | 94.0      | 96.0      | 97.5      | 98.4      | 99.1      | 99.5      | 99.7      | 99.9      | 99.9      | 100       | 100       | 100       | 100       |     |
|               | 16  | 24.3        | 42.9      | 57.4      | 68.6      | 77.2      | 83.7      | 88.6      | 92.2      | 94.8      | 96.6      | 97.9      | 98.7      | 99.3      | 99.6      | 99.8      | 99.9      | 100       | 100       | 100       | 100       | 100       | 100 |
|               | 17  | 25.4        | 44.6      | 59.2      | 70.4      | 78.8      | 85.1      | 89.7      | 93.1      | 95.5      | 97.1      | 98.2      | 99.0      | 99.4      | 99.7      | 99.8      | 99.9      | 100       | 100       | 100       | 100       | 100       | 100 |
| Internalizing | 12  | 22.1        | 38.6      | 51.7      | 62.3      | 70.9      | 77.8      | 83.3      | 87.7      | 91.1      | 93.7      | 95.6      | 97.1      | 98.1      | 98.9      | 99.4      | 99.7      | 99.8      | 99.9      | 100       | 100       | 100       |     |
|               | 13  | 21.3        | 37.9      | 51.3      | 62.1      | 70.8      | 77.8      | 83.4      | 87.8      | 91.3      | 93.9      | 95.8      | 97.2      | 98.3      | 98.9      | 99.4      | 99.7      | 99.9      | 99.9      | 100       | 100       | 100       |     |
|               | 14  | 20.7        | 37.2      | 50.8      | 61.8      | 70.7      | 77.9      | 83.6      | 88.0      | 91.4      | 94.0      | 96.0      | 97.4      | 98.4      | 99.0      | 99.5      | 99.7      | 99.9      | 100       | 100       | 100       | 100       |     |
|               | 15  | 20.0        | 36.6      | 50.3      | 61.5      | 70.6      | 77.9      | 83.7      | 88.2      | 91.6      | 94.2      | 96.1      | 97.5      | 98.5      | 99.1      | 99.5      | 99.8      | 99.9      | 100       | 100       | 100       | 100       |     |
|               | 16  | 19.3        | 35.9      | 49.8      | 61.2      | 70.5      | 78.0      | 83.8      | 88.4      | 91.8      | 94.4      | 96.3      | 97.6      | 98.6      | 99.2      | 99.6      | 99.8      | 99.9      | 100       | 100       | 100       | 100       | 100 |
|               | 17  | 18.7        | 35.3      | 49.3      | 61.0      | 70.4      | 78.0      | 83.9      | 88.5      | 92.0      | 94.6      | 96.5      | 97.8      | 98.7      | 99.2      | 99.6      | 99.8      | 99.9      | 100       | 100       | 100       | 100       | 100 |
| Total         |     | <b>0</b>    | <b>1</b>  | <b>2</b>  | <b>3</b>  | <b>4</b>  | <b>5</b>  | <b>6</b>  | <b>7</b>  | <b>8</b>  | <b>9</b>  | <b>10</b> | <b>11</b> | <b>12</b> | <b>13</b> | <b>14</b> | <b>15</b> | <b>16</b> | <b>17</b> | <b>18</b> | <b>19</b> | <b>20</b> |     |
|               | 12  | 0.1         | 10.8      | 20.3      | 29.9      | 39.4      | 48.3      | 56.4      | 63.3      | 69.1      | 74.0      | 78.1      | 81.5      | 84.4      | 86.8      | 88.8      | 90.5      | 92.0      | 93.2      | 94.2      | 95.1      | 95.8      |     |
|               | 13  | 0.1         | 11.0      | 20.7      | 30.6      | 40.2      | 49.3      | 57.4      | 64.3      | 70.1      | 74.9      | 79.0      | 82.3      | 85.1      | 87.5      | 89.4      | 91.1      | 92.4      | 93.6      | 94.6      | 95.4      | 96.1      |     |
|               | 14  | 0.1         | 11.2      | 21.2      | 31.3      | 41.1      | 50.4      | 58.5      | 65.4      | 71.1      | 75.9      | 79.8      | 83.1      | 85.9      | 88.1      | 90.0      | 91.6      | 92.9      | 94.0      | 94.9      | 95.7      | 96.4      |     |
|               | 15  | 0.1         | 11.5      | 21.7      | 32.0      | 42.1      | 51.4      | 59.6      | 66.4      | 72.1      | 76.8      | 80.7      | 83.9      | 86.6      | 88.8      | 90.6      | 92.1      | 93.4      | 94.4      | 95.3      | 96.0      | 96.7      |     |
|               | 16  | 0.1         | 11.7      | 22.2      | 32.8      | 43.1      | 52.5      | 60.7      | 67.5      | 73.1      | 77.8      | 81.6      | 84.7      | 87.3      | 89.4      | 91.2      | 92.6      | 93.8      | 94.8      | 95.7      | 96.4      | 96.9      |     |
|               | 17  | 0.1         | 12.0      | 22.8      | 33.6      | 44.1      | 53.7      | 61.9      | 68.6      | 74.2      | 78.7      | 82.4      | 85.5      | 88.0      | 90.0      | 91.7      | 93.1      | 94.3      | 95.2      | 96.0      | 96.6      | 97.2      |     |
|               |     |             | <b>21</b> | <b>22</b> | <b>23</b> | <b>24</b> | <b>25</b> | <b>26</b> | <b>27</b> | <b>28</b> | <b>29</b> | <b>30</b> | <b>31</b> | <b>32</b> | <b>33</b> | <b>34</b> | <b>35</b> | <b>36</b> | <b>37</b> | <b>38</b> | <b>39</b> | <b>40</b> |     |
|               | 12  |             | 96.4      | 96.9      | 97.4      | 97.7      | 98.1      | 98.3      | 98.6      | 98.8      | 98.9      | 99.1      | 99.2      | 99.3      | 99.4      | 99.5      | 99.6      | 99.6      | 99.7      | 99.7      | 99.8      | 100       |     |
|               | 13  |             | 96.7      | 97.2      | 97.6      | 97.9      | 98.2      | 98.5      | 98.7      | 98.9      | 99.0      | 99.2      | 99.3      | 99.4      | 99.5      | 99.5      | 99.6      | 99.7      | 99.7      | 99.7      | 99.8      | 100       |     |
|               | 14  |             | 96.9      | 97.4      | 97.8      | 98.1      | 98.4      | 98.6      | 98.8      | 99.0      | 99.1      | 99.3      | 99.4      | 99.5      | 99.5      | 99.6      | 99.7      | 99.7      | 99.7      | 99.8      | 99.8      | 100       |     |
|               | 15  |             | 97.2      | 97.6      | 98.0      | 98.3      | 98.5      | 98.8      | 98.9      | 99.1      | 99.2      | 99.3      | 99.4      | 99.5      | 99.6      | 99.6      | 99.7      | 99.7      | 99.8      | 99.8      | 99.9      | 100       |     |
|               | 16  |             | 97.4      | 97.8      | 98.2      | 98.4      | 98.7      | 98.9      | 99.0      | 99.2      | 99.3      | 99.4      | 99.5      | 99.6      | 99.6      | 99.7      | 99.7      | 99.8      | 99.8      | 99.8      | 99.9      | 100       |     |
| 17            |     | 97.6        | 98.0      | 98.3      | 98.6      | 98.8      | 99.0      | 99.1      | 99.3      | 99.4      | 99.5      | 99.6      | 99.6      | 99.7      | 99.7      | 99.8      | 99.8      | 99.8      | 99.9      | 99.9      | 100       |           |     |

SDQ = Strengths and Difficulties Questionnaire.

Cells containing percentiles  $\geq 90$  are shaded dark gray and cells containing percentiles from 80 up to 90 light gray, with the corresponding scale scores classified as falling in the 'abnormal' and 'borderline' range, respectively. The remaining scale scores are classified as 'normal'.

Table S5 Norms (percentiles) for the parent-reported SDQ version for male adolescents aged 12 to 17

| SDQ Scale     | Age | Scale score |      |      |      |      |      |      |      |      |      |     |
|---------------|-----|-------------|------|------|------|------|------|------|------|------|------|-----|
|               |     | 0           | 1    | 2    | 3    | 4    | 5    | 6    | 7    | 8    | 9    | 10  |
| Emotional     | 12  | 39.9        | 58.1 | 70.3 | 79.1 | 85.6 | 90.6 | 94.2 | 96.8 | 98.5 | 99.6 | 100 |
|               | 13  | 39.6        | 58.1 | 70.5 | 79.4 | 86.0 | 91.0 | 94.5 | 97.0 | 98.7 | 99.6 | 100 |
|               | 14  | 39.3        | 58.2 | 70.7 | 79.8 | 86.4 | 91.3 | 94.8 | 97.3 | 98.8 | 99.7 | 100 |
|               | 15  | 39.0        | 58.2 | 71.0 | 80.1 | 86.8 | 91.7 | 95.1 | 97.5 | 98.9 | 99.7 | 100 |
|               | 16  | 38.7        | 58.2 | 71.2 | 80.5 | 87.2 | 92.1 | 95.4 | 97.7 | 99.0 | 99.7 | 100 |
|               | 17  | 38.4        | 58.2 | 71.5 | 80.9 | 87.6 | 92.4 | 95.7 | 97.9 | 99.1 | 99.8 | 100 |
| Conduct       | 12  | 47.3        | 71.4 | 84.9 | 92.4 | 96.4 | 98.5 | 99.4 | 99.8 | 100  | 100  | 100 |
|               | 13  | 48.9        | 72.0 | 84.9 | 92.1 | 96.2 | 98.3 | 99.3 | 99.8 | 99.9 | 100  | 100 |
|               | 14  | 50.6        | 72.7 | 84.9 | 91.9 | 95.9 | 98.1 | 99.2 | 99.7 | 99.9 | 100  | 100 |
|               | 15  | 52.3        | 73.3 | 84.9 | 91.7 | 95.6 | 97.9 | 99.1 | 99.7 | 99.9 | 100  | 100 |
|               | 16  | 54.0        | 74.0 | 85.0 | 91.5 | 95.4 | 97.6 | 98.9 | 99.6 | 99.9 | 100  | 100 |
|               | 17  | 55.7        | 74.7 | 85.0 | 91.3 | 95.1 | 97.4 | 98.8 | 99.5 | 99.8 | 100  | 100 |
| Hyperactivity | 12  | 13.5        | 27.2 | 40.3 | 52.4 | 63.5 | 73.3 | 81.8 | 88.8 | 94.2 | 98.0 | 100 |
|               | 13  | 13.7        | 28.2 | 42.1 | 54.9 | 66.4 | 76.2 | 84.4 | 90.9 | 95.6 | 98.6 | 100 |
|               | 14  | 14.1        | 29.4 | 44.1 | 57.6 | 69.3 | 79.1 | 86.9 | 92.8 | 96.7 | 99.1 | 100 |
|               | 15  | 14.5        | 30.7 | 46.3 | 60.3 | 72.2 | 81.8 | 89.2 | 94.4 | 97.6 | 99.4 | 100 |
|               | 16  | 15.0        | 32.2 | 48.6 | 63.1 | 75.1 | 84.4 | 91.2 | 95.7 | 98.3 | 99.6 | 100 |
|               | 17  | 15.6        | 33.8 | 51.1 | 66.0 | 77.9 | 86.8 | 92.9 | 96.8 | 98.8 | 99.8 | 100 |
| Social        | 12  | 33.7        | 56.1 | 71.8 | 82.6 | 89.8 | 94.5 | 97.3 | 98.9 | 99.6 | 99.9 | 100 |
|               | 13  | 32.0        | 54.9 | 71.1 | 82.4 | 89.9 | 94.6 | 97.5 | 99.0 | 99.7 | 99.9 | 100 |
|               | 14  | 30.4        | 53.6 | 70.5 | 82.2 | 89.9 | 94.8 | 97.6 | 99.1 | 99.7 | 99.9 | 100 |
|               | 15  | 28.8        | 52.4 | 69.8 | 82.0 | 90.0 | 94.9 | 97.7 | 99.1 | 99.7 | 100  | 100 |
|               | 16  | 27.3        | 51.1 | 69.1 | 81.8 | 90.0 | 95.0 | 97.8 | 99.2 | 99.8 | 100  | 100 |
|               | 17  | 25.8        | 49.8 | 68.4 | 81.5 | 90.1 | 95.2 | 97.9 | 99.3 | 99.8 | 100  | 100 |
| prosocial     | 12  | 100         | 99.8 | 99.3 | 98.0 | 95.4 | 90.8 | 82.9 | 70.8 | 53.1 | 29.1 | 0.0 |
|               | 13  | 100         | 99.8 | 99.3 | 98.1 | 95.5 | 90.6 | 82.3 | 69.3 | 50.7 | 26.3 | 0.0 |
|               | 14  | 100         | 99.9 | 99.4 | 98.2 | 95.6 | 90.4 | 81.6 | 67.8 | 48.2 | 23.7 | 0.0 |
|               | 15  | 100         | 99.9 | 99.5 | 98.3 | 95.6 | 90.2 | 80.8 | 66.1 | 45.6 | 21.3 | 0.0 |
|               | 16  | 100         | 99.9 | 99.5 | 98.3 | 95.5 | 89.9 | 79.9 | 64.3 | 43.0 | 19.0 | 0.0 |
|               | 17  | 100         | 99.9 | 99.5 | 98.4 | 95.5 | 89.6 | 78.9 | 62.4 | 40.4 | 16.8 | 0.0 |

SDQ = Strengths and Difficulties Questionnaire.

Cells containing percentiles  $\geq 90$  are shaded dark gray and cells containing percentiles from 80 up to 90 light gray, with the corresponding scale scores classified as falling in the 'abnormal' and 'borderline' range, respectively. The remaining scale scores are classified as 'normal'.

Table S5 (continued) Norms (percentiles) for the parent-reported SDQ version for male adolescents aged 12 to 17

| SDQ Scale     | Age | Scale score |           |           |           |           |           |           |           |           |           |           |           |           |           |           |           |           |           |           |           |           |
|---------------|-----|-------------|-----------|-----------|-----------|-----------|-----------|-----------|-----------|-----------|-----------|-----------|-----------|-----------|-----------|-----------|-----------|-----------|-----------|-----------|-----------|-----------|
|               |     | 0           | 1         | 2         | 3         | 4         | 5         | 6         | 7         | 8         | 9         | 10        | 11        | 12        | 13        | 14        | 15        | 16        | 17        | 18        | 19        | 20        |
| Externalizing | 12  | 10.1        | 21.8      | 33.5      | 44.5      | 54.5      | 63.4      | 71.2      | 77.7      | 83.2      | 87.6      | 91.1      | 93.9      | 95.9      | 97.4      | 98.5      | 99.2      | 99.6      | 99.8      | 99.9      | 100       | 100       |
|               | 13  | 10.7        | 23.0      | 35.2      | 46.5      | 56.7      | 65.6      | 73.2      | 79.6      | 84.8      | 89.0      | 92.3      | 94.8      | 96.6      | 97.9      | 98.8      | 99.4      | 99.7      | 99.9      | 100       | 100       | 100       |
|               | 14  | 11.4        | 24.3      | 36.9      | 48.6      | 58.9      | 67.8      | 75.3      | 81.5      | 86.4      | 90.3      | 93.3      | 95.6      | 97.2      | 98.3      | 99.0      | 99.5      | 99.8      | 99.9      | 100       | 100       | 100       |
|               | 15  | 12.1        | 25.7      | 38.8      | 50.7      | 61.1      | 69.9      | 77.3      | 83.2      | 87.9      | 91.6      | 94.3      | 96.3      | 97.7      | 98.6      | 99.3      | 99.6      | 99.8      | 99.9      | 100       | 100       | 100       |
|               | 16  | 12.9        | 27.1      | 40.6      | 52.8      | 63.2      | 72.0      | 79.2      | 84.9      | 89.3      | 92.7      | 95.1      | 96.9      | 98.1      | 98.9      | 99.4      | 99.7      | 99.9      | 100       | 100       | 100       | 100       |
|               | 17  | 13.7        | 28.6      | 42.6      | 54.9      | 65.4      | 74.1      | 81.0      | 86.4      | 90.6      | 93.7      | 95.9      | 97.4      | 98.5      | 99.2      | 99.6      | 99.8      | 99.9      | 100       | 100       | 100       | 100       |
| Internalizing | 12  | 19.5        | 35.0      | 47.9      | 58.6      | 67.4      | 74.7      | 80.6      | 85.4      | 89.2      | 92.2      | 94.5      | 96.3      | 97.6      | 98.5      | 99.1      | 99.5      | 99.8      | 99.9      | 100       | 100       | 100       |
|               | 13  | 18.8        | 34.3      | 47.4      | 58.2      | 67.2      | 74.7      | 80.7      | 85.6      | 89.4      | 92.4      | 94.7      | 96.4      | 97.7      | 98.6      | 99.2      | 99.6      | 99.8      | 99.9      | 100       | 100       | 100       |
|               | 14  | 18.1        | 33.7      | 46.8      | 57.9      | 67.1      | 74.7      | 80.8      | 85.7      | 89.6      | 92.6      | 94.9      | 96.6      | 97.8      | 98.7      | 99.2      | 99.6      | 99.8      | 99.9      | 100       | 100       | 100       |
|               | 15  | 17.5        | 33.0      | 46.3      | 57.6      | 66.9      | 74.7      | 80.9      | 85.9      | 89.8      | 92.8      | 95.1      | 96.8      | 97.9      | 98.8      | 99.3      | 99.6      | 99.8      | 99.9      | 100       | 100       | 100       |
|               | 16  | 16.8        | 32.3      | 45.8      | 57.2      | 66.8      | 74.7      | 81.0      | 86.1      | 90.0      | 93.0      | 95.3      | 96.9      | 98.1      | 98.8      | 99.4      | 99.7      | 99.9      | 99.9      | 100       | 100       | 100       |
|               | 17  | 16.2        | 31.6      | 45.3      | 56.9      | 66.7      | 74.7      | 81.1      | 86.2      | 90.2      | 93.2      | 95.4      | 97.0      | 98.2      | 98.9      | 99.4      | 99.7      | 99.9      | 100       | 100       | 100       | 100       |
| Total         |     | <b>0</b>    | <b>1</b>  | <b>2</b>  | <b>3</b>  | <b>4</b>  | <b>5</b>  | <b>6</b>  | <b>7</b>  | <b>8</b>  | <b>9</b>  | <b>10</b> | <b>11</b> | <b>12</b> | <b>13</b> | <b>14</b> | <b>15</b> | <b>16</b> | <b>17</b> | <b>18</b> | <b>19</b> | <b>20</b> |
|               | 12  | 0.0         | 7.4       | 14.3      | 21.6      | 29.2      | 36.9      | 44.5      | 51.7      | 58.3      | 64.0      | 69.0      | 73.4      | 77.1      | 80.4      | 83.2      | 85.5      | 87.6      | 89.3      | 90.8      | 92.1      | 93.2      |
|               | 13  | 0.0         | 7.5       | 14.5      | 22.0      | 29.8      | 37.6      | 45.3      | 52.6      | 59.1      | 64.9      | 69.9      | 74.2      | 77.9      | 81.1      | 83.8      | 86.1      | 88.1      | 89.8      | 91.3      | 92.5      | 93.6      |
|               | 14  | 0.0         | 7.6       | 14.8      | 22.4      | 30.4      | 38.3      | 46.1      | 53.5      | 60.0      | 65.8      | 70.7      | 75.0      | 78.6      | 81.8      | 84.4      | 86.7      | 88.6      | 90.3      | 91.7      | 92.9      | 93.9      |
|               | 15  | 0.0         | 7.8       | 15.1      | 22.9      | 31.0      | 39.1      | 47.0      | 54.4      | 60.9      | 66.6      | 71.6      | 75.8      | 79.4      | 82.4      | 85.1      | 87.3      | 89.2      | 90.8      | 92.1      | 93.3      | 94.3      |
|               | 16  | 0.0         | 7.9       | 15.3      | 23.3      | 31.6      | 39.8      | 47.9      | 55.3      | 61.9      | 67.5      | 72.4      | 76.6      | 80.1      | 83.1      | 85.7      | 87.8      | 89.7      | 91.2      | 92.6      | 93.7      | 94.6      |
|               | 17  | 0.0         | 8.0       | 15.6      | 23.8      | 32.2      | 40.6      | 48.8      | 56.2      | 62.8      | 68.4      | 73.3      | 77.4      | 80.9      | 83.8      | 86.3      | 88.4      | 90.2      | 91.7      | 93.0      | 94.0      | 94.9      |
|               |     |             | <b>21</b> | <b>22</b> | <b>23</b> | <b>24</b> | <b>25</b> | <b>26</b> | <b>27</b> | <b>28</b> | <b>29</b> | <b>30</b> | <b>31</b> | <b>32</b> | <b>33</b> | <b>34</b> | <b>35</b> | <b>36</b> | <b>37</b> | <b>38</b> | <b>39</b> | <b>40</b> |
|               | 12  |             | 94.2      | 95.0      | 95.7      | 96.3      | 96.8      | 97.2      | 97.6      | 97.9      | 98.2      | 98.5      | 98.7      | 98.9      | 99.0      | 99.1      | 99.3      | 99.4      | 99.4      | 99.5      | 99.7      | 100       |
|               | 13  |             | 94.5      | 95.3      | 95.9      | 96.5      | 97.0      | 97.4      | 97.8      | 98.1      | 98.4      | 98.6      | 98.8      | 98.9      | 99.1      | 99.2      | 99.3      | 99.4      | 99.5      | 99.6      | 99.7      | 100       |
|               | 14  |             | 94.8      | 95.6      | 96.2      | 96.7      | 97.2      | 97.6      | 97.9      | 98.2      | 98.5      | 98.7      | 98.9      | 99.0      | 99.2      | 99.3      | 99.4      | 99.5      | 99.5      | 99.6      | 99.8      | 100       |
|               | 15  |             | 95.1      | 95.8      | 96.4      | 97.0      | 97.4      | 97.8      | 98.1      | 98.4      | 98.6      | 98.8      | 99.0      | 99.1      | 99.2      | 99.3      | 99.4      | 99.5      | 99.6      | 99.6      | 99.8      | 100       |
|               | 16  |             | 95.4      | 96.1      | 96.7      | 97.2      | 97.6      | 97.9      | 98.2      | 98.5      | 98.7      | 98.9      | 99.1      | 99.2      | 99.3      | 99.4      | 99.5      | 99.6      | 99.6      | 99.7      | 99.8      | 100       |
| 17            |     | 95.7        | 96.4      | 96.9      | 97.4      | 97.8      | 98.1      | 98.4      | 98.6      | 98.8      | 99.0      | 99.1      | 99.3      | 99.4      | 99.5      | 99.5      | 99.6      | 99.7      | 99.8      | 99.9      | 100       |           |

SDQ = Strengths and Difficulties Questionnaire.

Cells containing percentiles  $\geq 90$  are shaded dark gray and cells containing percentiles from 80 up to 90 light gray, with the corresponding scale scores classified as falling in the 'abnormal' and 'borderline' range, respectively. The remaining scale scores are classified as 'normal'.

Table S6 Norms (percentiles) for the parent-reported SDQ version for adolescents aged 12 to 17, without distinguishing between genders

| SDQ Scale     | Age | Scale score |      |      |      |      |      |      |      |      |      |     |
|---------------|-----|-------------|------|------|------|------|------|------|------|------|------|-----|
|               |     | 0           | 1    | 2    | 3    | 4    | 5    | 6    | 7    | 8    | 9    | 10  |
| Emotional     | 12  | 36.1        | 55.1 | 68.2 | 77.9 | 85.1 | 90.4 | 94.3 | 96.9 | 98.7 | 99.6 | 100 |
|               | 13  | 35.9        | 55.3 | 68.7 | 78.5 | 85.7 | 91.0 | 94.7 | 97.3 | 98.8 | 99.7 | 100 |
|               | 14  | 35.7        | 55.5 | 69.2 | 79.1 | 86.3 | 91.5 | 95.2 | 97.6 | 99.0 | 99.7 | 100 |
|               | 15  | 35.6        | 55.8 | 69.7 | 79.7 | 87.0 | 92.1 | 95.6 | 97.8 | 99.1 | 99.8 | 100 |
|               | 16  | 35.4        | 56.0 | 70.2 | 80.4 | 87.6 | 92.6 | 96.0 | 98.1 | 99.3 | 99.8 | 100 |
|               | 17  | 35.3        | 56.3 | 70.7 | 81.0 | 88.2 | 93.1 | 96.3 | 98.3 | 99.4 | 99.9 | 100 |
| Conduct       | 12  | 46.5        | 71.6 | 85.6 | 93.1 | 96.9 | 98.8 | 99.6 | 99.9 | 100  | 100  | 100 |
|               | 13  | 48.1        | 72.8 | 86.2 | 93.4 | 97.0 | 98.8 | 99.6 | 99.9 | 100  | 100  | 100 |
|               | 14  | 49.7        | 73.9 | 86.8 | 93.6 | 97.2 | 98.8 | 99.6 | 99.9 | 100  | 100  | 100 |
|               | 15  | 51.3        | 74.9 | 87.3 | 93.9 | 97.3 | 98.9 | 99.6 | 99.9 | 100  | 100  | 100 |
|               | 16  | 52.9        | 75.9 | 87.9 | 94.1 | 97.4 | 98.9 | 99.6 | 99.9 | 100  | 100  | 100 |
|               | 17  | 54.4        | 76.9 | 88.4 | 94.4 | 97.4 | 98.9 | 99.6 | 99.9 | 100  | 100  | 100 |
| Hyperactivity | 12  | 20.7        | 36.5 | 49.7 | 60.9 | 70.6 | 78.7 | 85.6 | 91.1 | 95.4 | 98.4 | 100 |
|               | 13  | 21.4        | 38.1 | 52.1 | 63.8 | 73.6 | 81.6 | 88.1 | 93.1 | 96.7 | 98.9 | 100 |
|               | 14  | 22.2        | 39.9 | 54.6 | 66.7 | 76.6 | 84.4 | 90.4 | 94.7 | 97.6 | 99.3 | 100 |
|               | 15  | 23.0        | 41.9 | 57.3 | 69.7 | 79.4 | 86.9 | 92.3 | 96.1 | 98.4 | 99.6 | 100 |
|               | 16  | 24.0        | 44.0 | 60.0 | 72.6 | 82.2 | 89.2 | 94.0 | 97.1 | 98.9 | 99.7 | 100 |
|               | 17  | 25.1        | 46.2 | 62.9 | 75.6 | 84.8 | 91.3 | 95.5 | 98.0 | 99.3 | 99.8 | 100 |
| Social        | 12  | 39.8        | 61.4 | 75.4 | 84.8 | 91.0 | 95.1 | 97.5 | 98.9 | 99.6 | 99.9 | 100 |
|               | 13  | 38.6        | 60.7 | 75.2 | 84.8 | 91.2 | 95.2 | 97.7 | 99.0 | 99.7 | 99.9 | 100 |
|               | 14  | 37.4        | 60.0 | 74.9 | 84.9 | 91.4 | 95.4 | 97.8 | 99.1 | 99.7 | 99.9 | 100 |
|               | 15  | 36.3        | 59.3 | 74.7 | 84.9 | 91.6 | 95.6 | 98.0 | 99.2 | 99.8 | 100  | 100 |
|               | 16  | 35.1        | 58.6 | 74.5 | 85.0 | 91.7 | 95.8 | 98.1 | 99.3 | 99.8 | 100  | 100 |
|               | 17  | 34.0        | 57.9 | 74.2 | 85.1 | 91.9 | 96.0 | 98.2 | 99.3 | 99.8 | 100  | 100 |
| prosocial     | 12  | 100         | 99.7 | 99.1 | 97.8 | 95.3 | 91.0 | 84.2 | 73.7 | 58.2 | 35.4 | 0.0 |
|               | 13  | 100         | 99.8 | 99.2 | 97.9 | 95.4 | 90.9 | 83.7 | 72.6 | 56.2 | 32.8 | 0.0 |
|               | 14  | 100         | 99.8 | 99.3 | 98.0 | 95.4 | 90.8 | 83.2 | 71.5 | 54.2 | 30.3 | 0.0 |
|               | 15  | 100         | 99.8 | 99.3 | 98.1 | 95.5 | 90.7 | 82.7 | 70.2 | 52.1 | 27.9 | 0.0 |
|               | 16  | 100         | 99.8 | 99.4 | 98.2 | 95.5 | 90.6 | 82.1 | 68.9 | 49.9 | 25.6 | 0.0 |
|               | 17  | 100         | 99.9 | 99.4 | 98.2 | 95.6 | 90.4 | 81.5 | 67.5 | 47.8 | 23.3 | 0.0 |

SDQ = Strengths and Difficulties Questionnaire.

Cells containing percentiles  $\geq 90$  are shaded dark gray and cells containing percentiles from 80 up to 90 light gray, with the corresponding scale scores classified as falling in the 'abnormal' and 'borderline' range, respectively. The remaining scale scores are classified as 'normal'.

Table S6 (continued) Norms (percentiles) for the parent-reported SDQ version for adolescents aged 12 to 17, without distinguishing between genders

| SDQ Scale     | Age | Scale score |           |           |           |           |           |           |           |           |           |           |           |           |           |           |           |           |           |           |           |           |
|---------------|-----|-------------|-----------|-----------|-----------|-----------|-----------|-----------|-----------|-----------|-----------|-----------|-----------|-----------|-----------|-----------|-----------|-----------|-----------|-----------|-----------|-----------|
|               |     | 0           | 1         | 2         | 3         | 4         | 5         | 6         | 7         | 8         | 9         | 10        | 11        | 12        | 13        | 14        | 15        | 16        | 17        | 18        | 19        | 20        |
| Externalizing | 12  | 14.8        | 28.7      | 41.1      | 52.0      | 61.4      | 69.4      | 76.2      | 81.7      | 86.3      | 89.9      | 92.8      | 95.0      | 96.7      | 97.9      | 98.7      | 99.3      | 99.7      | 99.9      | 100       | 100       | 100       |
|               | 13  | 15.7        | 30.2      | 43.2      | 54.3      | 63.8      | 71.8      | 78.4      | 83.8      | 88.1      | 91.4      | 94.0      | 96.0      | 97.4      | 98.4      | 99.1      | 99.5      | 99.8      | 99.9      | 100       | 100       | 100       |
|               | 14  | 16.5        | 31.8      | 45.2      | 56.7      | 66.3      | 74.2      | 80.6      | 85.7      | 89.7      | 92.8      | 95.1      | 96.8      | 98.0      | 98.8      | 99.3      | 99.7      | 99.8      | 99.9      | 100       | 100       | 100       |
|               | 15  | 17.5        | 33.5      | 47.4      | 59.0      | 68.7      | 76.4      | 82.6      | 87.5      | 91.2      | 94.0      | 96.0      | 97.4      | 98.4      | 99.1      | 99.5      | 99.8      | 99.9      | 100       | 100       | 100       | 100       |
|               | 16  | 18.5        | 35.3      | 49.6      | 61.4      | 71.0      | 78.6      | 84.6      | 89.1      | 92.5      | 95.0      | 96.8      | 98.0      | 98.8      | 99.3      | 99.7      | 99.8      | 99.9      | 100       | 100       | 100       | 100       |
|               | 17  | 19.6        | 37.1      | 51.8      | 63.8      | 73.3      | 80.7      | 86.4      | 90.6      | 93.7      | 95.9      | 97.4      | 98.5      | 99.1      | 99.5      | 99.8      | 99.9      | 100       | 100       | 100       | 100       | 100       |
| Internalizing | 12  | 20.6        | 36.5      | 49.4      | 60.0      | 68.7      | 75.8      | 81.6      | 86.2      | 89.9      | 92.7      | 94.9      | 96.5      | 97.7      | 98.6      | 99.2      | 99.6      | 99.8      | 99.9      | 100       | 100       | 100       |
|               | 13  | 20.0        | 36.0      | 49.1      | 59.9      | 68.8      | 76.0      | 81.9      | 86.5      | 90.2      | 93.0      | 95.2      | 96.8      | 97.9      | 98.7      | 99.3      | 99.6      | 99.8      | 99.9      | 100       | 100       | 100       |
|               | 14  | 19.4        | 35.4      | 48.7      | 59.8      | 68.8      | 76.2      | 82.1      | 86.8      | 90.5      | 93.3      | 95.4      | 97.0      | 98.1      | 98.8      | 99.3      | 99.7      | 99.8      | 99.9      | 100       | 100       | 100       |
|               | 15  | 18.8        | 34.9      | 48.4      | 59.7      | 68.9      | 76.4      | 82.4      | 87.1      | 90.8      | 93.6      | 95.7      | 97.2      | 98.2      | 98.9      | 99.4      | 99.7      | 99.9      | 99.9      | 100       | 100       | 100       |
|               | 16  | 18.2        | 34.3      | 48.1      | 59.5      | 69.0      | 76.6      | 82.7      | 87.4      | 91.1      | 93.9      | 95.9      | 97.4      | 98.4      | 99.1      | 99.5      | 99.7      | 99.9      | 100       | 100       | 100       | 100       |
|               | 17  | 17.6        | 33.8      | 47.7      | 59.4      | 69.1      | 76.8      | 83.0      | 87.8      | 91.4      | 94.1      | 96.1      | 97.5      | 98.5      | 99.1      | 99.5      | 99.8      | 99.9      | 100       | 100       | 100       | 100       |
| Total         |     | <b>0</b>    | <b>1</b>  | <b>2</b>  | <b>3</b>  | <b>4</b>  | <b>5</b>  | <b>6</b>  | <b>7</b>  | <b>8</b>  | <b>9</b>  | <b>10</b> | <b>11</b> | <b>12</b> | <b>13</b> | <b>14</b> | <b>15</b> | <b>16</b> | <b>17</b> | <b>18</b> | <b>19</b> | <b>20</b> |
|               | 12  | 0.1         | 8.8       | 16.7      | 24.9      | 33.1      | 41.1      | 48.8      | 55.8      | 62.0      | 67.3      | 72.0      | 76.0      | 79.4      | 82.3      | 84.9      | 87.0      | 88.8      | 90.4      | 91.8      | 92.9      | 93.9      |
|               | 13  | 0.1         | 9.1       | 17.3      | 25.7      | 34.2      | 42.5      | 50.3      | 57.4      | 63.5      | 68.9      | 73.4      | 77.3      | 80.7      | 83.5      | 85.9      | 88.0      | 89.7      | 91.2      | 92.5      | 93.6      | 94.5      |
|               | 14  | 0.1         | 9.4       | 17.9      | 26.6      | 35.4      | 43.9      | 51.9      | 59.0      | 65.1      | 70.4      | 74.9      | 78.7      | 82.0      | 84.7      | 87.0      | 89.0      | 90.6      | 92.0      | 93.2      | 94.2      | 95.1      |
|               | 15  | 0.1         | 9.7       | 18.5      | 27.6      | 36.7      | 45.5      | 53.6      | 60.7      | 66.8      | 72.0      | 76.4      | 80.1      | 83.2      | 85.9      | 88.1      | 89.9      | 91.5      | 92.8      | 93.9      | 94.9      | 95.6      |
|               | 16  | 0.1         | 10.0      | 19.2      | 28.7      | 38.1      | 47.1      | 55.3      | 62.4      | 68.5      | 73.6      | 77.9      | 81.5      | 84.5      | 87.0      | 89.1      | 90.9      | 92.3      | 93.6      | 94.6      | 95.4      | 96.2      |
|               | 17  | 0.1         | 10.4      | 20.0      | 29.8      | 39.6      | 48.8      | 57.1      | 64.3      | 70.2      | 75.3      | 79.4      | 82.9      | 85.8      | 88.2      | 90.1      | 91.8      | 93.2      | 94.3      | 95.2      | 96.0      | 96.7      |
|               |     |             | <b>21</b> | <b>22</b> | <b>23</b> | <b>24</b> | <b>25</b> | <b>26</b> | <b>27</b> | <b>28</b> | <b>29</b> | <b>30</b> | <b>31</b> | <b>32</b> | <b>33</b> | <b>34</b> | <b>35</b> | <b>36</b> | <b>37</b> | <b>38</b> | <b>39</b> | <b>40</b> |
|               | 12  |             | 94.8      | 95.5      | 96.1      | 96.6      | 97.1      | 97.5      | 97.8      | 98.1      | 98.4      | 98.6      | 98.8      | 99.0      | 99.1      | 99.2      | 99.3      | 99.4      | 99.5      | 99.7      | 99.8      | 100       |
|               | 13  |             | 95.3      | 96.0      | 96.5      | 97.0      | 97.5      | 97.8      | 98.1      | 98.4      | 98.6      | 98.8      | 99.0      | 99.1      | 99.2      | 99.3      | 99.4      | 99.5      | 99.6      | 99.7      | 99.8      | 100       |
|               | 14  |             | 95.8      | 96.4      | 97.0      | 97.4      | 97.8      | 98.1      | 98.4      | 98.6      | 98.8      | 99.0      | 99.1      | 99.2      | 99.4      | 99.4      | 99.5      | 99.6      | 99.6      | 99.7      | 99.8      | 100       |
|               | 15  |             | 96.3      | 96.9      | 97.3      | 97.7      | 98.1      | 98.4      | 98.6      | 98.8      | 99.0      | 99.1      | 99.3      | 99.4      | 99.5      | 99.5      | 99.6      | 99.7      | 99.7      | 99.8      | 99.8      | 100       |
|               | 16  |             | 96.8      | 97.3      | 97.7      | 98.1      | 98.4      | 98.6      | 98.8      | 99.0      | 99.2      | 99.3      | 99.4      | 99.5      | 99.6      | 99.6      | 99.7      | 99.7      | 99.8      | 99.8      | 99.9      | 100       |
| 17            |     | 97.2        | 97.7      | 98.0      | 98.3      | 98.6      | 98.8      | 99.0      | 99.2      | 99.3      | 99.4      | 99.5      | 99.6      | 99.6      | 99.7      | 99.7      | 99.8      | 99.8      | 99.8      | 99.9      | 100       |           |

SDQ = Strengths and Difficulties Questionnaire.

Cells containing percentiles  $\geq 90$  are shaded dark gray and cells containing percentiles from 80 up to 90 light gray, with the corresponding scale scores classified as falling in the 'abnormal' and 'borderline' range, respectively. The remaining scale scores are classified as 'normal'.
